1 **Determinants of Hepatitis B Viral infection among pregnant women in Greater Monrovia,**  
2 **Liberia**

3 **Authors:** Henry Torbandu Kohar<sup>1</sup>, \*George Asumah Adu<sup>2</sup>, Henry Ofosu Addo<sup>3</sup>, Edwin Afari<sup>1</sup>,  
4 Ernest Kenu<sup>1</sup>, Frederick Wurapa<sup>1</sup>

5 <sup>1</sup> Department of Epidemiology and Disease Control, School Public Health, University of Ghana,  
6 Accra, Ghana

7 <sup>2</sup> National Malaria Elimination Programme, Public Health Division, Ghana Health Service,  
8 Accra, Ghana

9 <sup>3</sup> Department of Animal Biology and Conservation Science, College of Basic and Applied  
10 Sciences, University of Ghana

11 \*Corresponding author

12 Email: [georgeaduasumah@yahoo.com](mailto:georgeaduasumah@yahoo.com)

13

14 **Abstract**

15 **Background:** The global prevalence of hepatitis B virus infection is estimated to affect over 2  
16 billion individuals, with a notable proportion ranging from 6% to 25% residing in the Sub-Saharan  
17 African region. The prevalence of hepatitis B virus (HBV) in Liberia, Guinea, and Sierra Leone  
18 has been estimated to be approximately 2%. However, current understanding of the actual risk  
19 factors associated with HBV in the Greater Monrovia remains unclear. Consequently, this study  
20 aimed to identify the factors associated with hepatitis B Viral infection among pregnant women  
21 residing in Greater Monrovia, Liberia.

22 **Methods:** An unmatched case control study of 141 cases of HBV infected pregnant women and  
23 141 controls was conducted. Data on socio-demographic characteristics, lifestyle activities and  
24 medical related risk factors were collected for both groups with a structured questionnaire.  
25 Bivariate and multivariate analyses established associations between the HBV infection and risk  
26 factors studied.

27 **Results:** In all, 141 cases of HBV infected pregnant women and 141 controls participated in this  
28 study. The mean age of cases was 35.6 years (SD  $\pm$ 9.5) and 36.1 years (SD  $\pm$ 8.4) for controls.  
29 Low-income level <100 dollars [aOR 13.0 (4.48-37.82,  $p$ <0.001)], employment [aOR 0.04 (0.09-  
30 0.18)  $p$ <0.001], STI history [aOR 5.19 (1.68-16.02,  $p$ =0.004)] and living with a HBV infected  
31 person [aOR 35.11 (4.24-58.90),  $p$ =0.001] were factors associated with HBV infection among  
32 pregnant women in Greater Monrovia.

33 **Conclusion:** The risk factors of HBV infection among pregnant women in Greater Monrovia were  
34 engagement in formal employment, low-income level, history of sexually transmitted infections  
35 (STIs), and residing with an individual infected with hepatitis B virus (HBV). Control efforts by  
36 designated state institutions should include advocacy and awareness creation on HBV status  
37 identification, safe sex, and vaccination of uninfected individuals.

38 **Keywords:** Case control Study, Greater Monrovia, Hepatitis B, Liberia, risk factors

39

## 40 **Introduction**

41 Hepatitis B (HBV) is a viral infection that targets the liver and has the ability of causing both acute  
42 and chronic illnesses. According to the World Health Organization in 2019, hepatitis B infection  
43 accounted for around 820,000 fatalities, primarily attributed to cirrhosis and hepatocellular

44 carcinoma, which is a kind of primary liver cancer (1,2). The transmission of the virus typically  
45 occurs through vertical transmission from mother to child (MTCT) during the process of  
46 childbirth, during early infancy, and through contact with blood or other bodily fluids during  
47 sexual intercourse with an infected partner, injections, or exposure to contaminated sharp tools  
48 (3,4). Hepatitis B viral infection is of public health concern (1,5). The prevalence of chronic  
49 infections was estimated to be at 296 million individuals in 2019, with an annual incidence of 1.5  
50 million new infections (6,7). Amongst these cases, it was observed that 68% resided in Africa and  
51 Western Pacific Asia (8,9). Moreover, it has been reported that a significant proportion, ranging  
52 from 5% to 15% of individuals residing in underdeveloped nations and countries with low  
53 income are persistently infected with the hepatitis B virus (10,11). In addition, the World Health  
54 Organization (WHO) reveals that hepatitis accounted for 1.34 million fatalities in 2015, a figure  
55 comparable to tuberculosis-related deaths but exceeding those attributed to HIV (12).  
56 Furthermore, a substantial number of children under the age of five, specifically 1.8 million, are  
57 currently afflicted with hepatitis B virus infection due to the high prices of HBV vaccine (13,14).  
58 Hepatitis B Virus disease is more prevalent in Sub-Saharan Africa; about 6 to 25 percent Sub  
59 Saharan Africans are infected with the disease (15,16). Greater Monrovia region and Liberia has  
60 a prevalence of about 2% (17). HBV among pregnant women poses a lot of threats to mother and  
61 fetus, leading to complications such as preterm delivery, low birth weight, threatened post-partum  
62 hemorrhage and other associated complications. It is estimated that up to 40% of Hepatitis B virus  
63 prevalence can be attributed to mother to child transmission, and the core factor for chronic HBV  
64 infection (18,19). Several studies have associated HBV infections to history of multiple sexual  
65 partners, previous blood transfusions, caring or living with HBV positive family member,  
66 tattooing, illicit drug use, accidental pricking with sharps and having unsafe abortions among

67 others (20,21). Presently, knowledge about the key risk factors is limited in Greater Monrovia and  
68 Liberia, therefore, this disease has not gained full national commitment and support from the  
69 Ministry of Health and other developing partners in Liberia. Greater Monrovia, being a business  
70 region, has a lot of its inhabitants constantly engaging in many risky behaviors which could expose  
71 them to the disease. Hence, this study sought to explore factors associated with HBV infection  
72 among pregnant women in Greater Monrovia to improve knowledge for enhanced control efforts.

73

74

## 75 **Methods**

### 76 **Study Design**

77 This study adopted an unmatched case-control study using quantitative research methods from  
78 August 2016 to July 2017. Data on Hepatitis B serum Agglutination (HbsAg) test results of both  
79 cases and controls as well as data on socio-demographic, previous medical exposures and lifestyle  
80 factors were collected from participants in diverse locations as deemed appropriate and convenient  
81 by participants.

### 82 **Study area**

83 This study was conducted in Greater Monrovia, the capital and commercial city of Liberia Greater  
84 Monrovia comprises all the ethnic groups in Liberia and has a population of 1.5 million (Figure  
85 1). It is bordered to the south by the Atlantic Ocean, the North by Paynesville, to the east by the  
86 Duazon community and to the west by Bushrod Island (Figure 1).

87

88 **Figure 1: Map of study area**

89 **Study population**

90 This study involved pregnant women between the ages of 18-50 years registered at an Antenatal  
91 Clinic (ANC) in Greater Monrovia between the period of January 2015 to March 2017.

92 **Case Definitions**

93 **Case**

94 A case was defined as an ANC registrant between the ages of 18-50 years, who resided in Greater  
95 Monrovia and attended ANC from January 2015–March 2017 and tested positive to HbsAg test.

96 **Control**

97 A control is defined as an ANC registrant between the ages of 18-50 years, who resided in Greater  
98 Monrovia and attended ANC from January 2015–March 2017 and tested negative to HbsAg test.

99 **Sample size determination**

100 To estimate the sample size for this study, a stat calculator in Epi info version 7 was used. It was  
101 assumed that 20% of the study population are exposed to the risk factors of HBV infection (22).  
102 A detection of an odds ratio of 2.5 with an 80% power is to be achieved with a 95% confidence  
103 level (5% significance). A ratio of 1:1 case and control was used and since the prevalence of several  
104 of the known risk factors for HBV, is unavailable for Liberia, the figure used as the least exposure  
105 prevalence was multiple sexual contacts which was derived from by a study conducted by (23). A  
106 total of 141 cases and 141 controls was derived and used for this study.

107

## 108 **Sampling procedure**

109 A multi-staged sampling was applied to select participants for this study. First of all, health  
110 facilities that provide ANC services were grouped into three based on facility ownership as  
111 follows: private, public and faith-based facilities. Table of random numbers was employed to select  
112 one facility from each group of facilities. The sampled facilities were John F. Kennedy Medical  
113 Centre for private hospitals, Eternal Love Winning Africa (ELWA) and James N. Davis (JFD) for  
114 the Faith-based and Government hospitals respectively. Based on proportional to size sampling,  
115 40% of the sample size (56 cases and corresponding controls) were drawn from the John F.  
116 Kennedy Memorial Hospital accounted for approximately, ELWA also accounted for 30% (43  
117 cases and corresponding controls), and a government hospital, and James N. Davis (JFD)  
118 contributed approximately 30% (42 cases and corresponding controls). A line list of pregnant  
119 women who tested positive for the HbsAg test was then generated from the ANC registration  
120 records for a period spanning January 2015 to March 2017. Finally, a table of random numbers  
121 was used to select respondents for the study. Same procedure was applied to the selection of  
122 controls in this study.

123

## 124 **Data Collection**

125 A semi-structured questionnaire consisting of questions on demographic characteristics, lifestyle  
126 and some previous medical exposures was administered face to face to the participants in their  
127 preferred places or via telephone in few instances where physical interviews was not possible. The  
128 questionnaire was pretested at Redemption Hospital in Greater Monrovia for reliability and  
129 efficiency before actual data was collected. The questionnaire was administered in English  
130 language as it is the official main language of communication of people in Monrovia. Help was  
131 also sought from an interpreter where participant speaks different tongue.

132 **Data analysis**

133 The raw data was inputted into Microsoft Excel spreadsheet (version 2010) and analyzed using  
134 Stata 13.0 software. Data was summarized as frequencies, proportions, means and medians where  
135 appropriate. Logistic regression analysis at p-value ( $<0.05$ ) significance level was used to assess  
136 association between the risk factors associated with HBV infection.

137 **Ethical consideration**

138 This study received ethical approval from the University of Liberia – Pacific Institute for Research  
139 & Evaluation Institutional Review Board (UL-PIRE IRB Assurance number FWA00004982).  
140 Formal permission was sought from the heads of John F. Kennedy Memorial Hospital, Eternal  
141 Love Winning Africa (ELWA) and James N. Davis Memorial Hospital. Written consent was  
142 obtained from all study participants before interviews were carried out. Study participants were  
143 made to understand their participation in the study was voluntary and could opt out of the study  
144 should they feel uncomfortable at any point in the study.

145

146

147

148

149

150

151

152

153 **Results**

154 **Socio- demographic characteristics of pregnant women, Monrovia in Liberia, 2017**

155 The mean age of cases was 35.6 years (SD  $\pm$ 9.5) and 36.1 years (SD  $\pm$ 8.4) for controls. More than  
156 a third of cases 39.0% (55/141) and controls 34.8% (49/141) had no formal education. Concerning  
157 employment, 5.0% (7/141) of cases compared with 21.3% (30/141) of controls were employed in  
158 the formal sector (Table 1).

159 **Table 1: Socio-demographic characteristics of participants**

| <b>Variables</b>          | <b>Cases</b>        | <b>Frequency (%)</b> | <b>Control</b>      | <b>Frequency (%)</b> |
|---------------------------|---------------------|----------------------|---------------------|----------------------|
| <b>Age (Mean)</b>         | 35.6 (SD $\pm$ 9.5) |                      | 36.1 (SD $\pm$ 8.4) |                      |
| <b>Educational status</b> |                     |                      |                     |                      |
| No Formal education       | 55                  | 39.0                 | 49                  | 34.8                 |
| Primary/JHS               | 26                  | 18.4                 | 27                  | 19.1                 |
| Secondary                 | 45                  | 32.0                 | 51                  | 36.2                 |
| Tertiary                  | 15                  | 10.6                 | 14                  | 9.9                  |
| <b>Employment</b>         |                     |                      |                     |                      |
| Formal Sector             | 7                   | 5.0                  | 30                  | 21.3                 |
| Informal Sector           | 127                 | 90.0                 | 100                 | 70.9                 |
| Unemployed                | 7                   | 5.0                  | 11                  | 8.0                  |
| <b>Marital Status</b>     |                     |                      |                     |                      |
| Married                   | 113                 | 80.1                 | 101                 | 71.6                 |
| Single                    | 28                  | 19.9                 | 40                  | 28.4                 |

160



161 **Socio-demographic characteristics and medical risk factors associated with hepatitis B**  
 162 **viral infection**

163 At crude level, earning an income of <100USD [cOR 6.32 (3.29-12.54), P<0.001], having  
 164 undergone major surgical procedure [cOR=4.71 (2.16-11.07) P<0.00], ever been diagnosed of an  
 165 STI [cOR=4.7 (2.16-11.07) P=0.020] and having a history of abortion [cOR= 3.44 (1.42-9.18),  
 166 P=0.003] increased the odds of HBV infection. On the other hand, been engaged in a formal sector  
 167 employment [cOR= 0.19 (0.08-0.43), P<0.001] reduced the odds of HBV infection in this study  
 168 (Table 2).

169  
 170 **Table 2: Bivariate analysis of socio-demographic and medical characteristics of pregnant**  
 171 **women in Greater Monori Liberia**

|                                           | Hepatitis B Disease |            | cOR (95% CI)             | P value |
|-------------------------------------------|---------------------|------------|--------------------------|---------|
|                                           | Cases               | Controls   |                          |         |
| <b>Age of PW</b>                          |                     |            |                          | 0.10    |
| ≥ 30 years                                | 89 (63.1)           | 102 (72.3) | 0.66 (0.38-1.12)         |         |
| < 30 years                                | 52 (36.9)           | 39 (27.7)  | 1.0                      |         |
| <b>Marital Status of PW</b>               |                     |            |                          | 0.10    |
| Single                                    | 28(19.9)            | 40 (28.4)  | 0.63 (0.35-1.13)         |         |
| Married                                   | 113 (80.1)          | 101 (71.6) | 1.0                      |         |
| <b>Education of PW</b>                    |                     |            |                          | 0.55    |
| ≥SHS                                      | 60 (42.6)           | 65 (46.1)  | 0.87 (0.52-1.42)         |         |
| <SHS                                      | 81(57.4)            | 76 (53.9)  | 1.0                      |         |
| <b>Employment status of PW</b>            |                     |            |                          | <0.000  |
| Formal Sector                             | 7 (6.0)             | 30 (23.0)  | <b>0.19 (0.08-0.43)</b>  |         |
| Informal Sector                           | 127 (94.0)          | 100 (77.0) | <b>1.0</b>               |         |
| <b>Income level of PW</b>                 |                     |            |                          | <0.000  |
| <100USD                                   | 62(44.9)            | 16 (11.4)  | <b>6.32 (3.29-12.54)</b> |         |
| ≥100USD                                   | 76 (55.1)           | 124 (88.6) | <b>1.0</b>               |         |
| <b>Blood History of Blood transfusion</b> |                     |            |                          |         |
| Yes                                       | 70 (50.4)           | 64 (45.4)  | 1.22 (0.74-1.0)          | 0.41    |
| No                                        | 69 (49.6)           | 77 (54.6)  | 1.0                      |         |
| <b>Major surgical procedure</b>           |                     |            |                          |         |
| Yes                                       | 37(26.4)            | 10 (7.1)   | <b>4.71 (2.16-11.07)</b> | <0.000  |
| No                                        | 103 (73.6)          | 131 (92.9) | <b>1.0</b>               |         |

|                              |            |            |                         |              |
|------------------------------|------------|------------|-------------------------|--------------|
| <b>Ever diagnosed an STI</b> |            |            |                         |              |
| <b>no data for this</b>      |            |            |                         |              |
| Yes                          | 72(53.2)   | 52(37.0)   | <b>1.79 (1.08-2.98)</b> | <b>0.020</b> |
| No                           | 67(46.8)   | 87(63.0)   | <b>1.0</b>              |              |
| <b>Ever done Abortion</b>    |            |            |                         |              |
| Yes                          | 24 (17.3)  | 8 (5.7)    | <b>3.44 (1.42-9.18)</b> |              |
| No                           | 115 (82.7) | 132 (94.3) | <b>1.0</b>              | <b>0.003</b> |

172

173

174 **Lifestyle risk factors associated with HBV infection**

175 Participants who had body tattoo and/or piercing [cOR= 2.46 (1.45-4.19), P=0.004], having  
 176 multiple sexual partners [cOR=17.06 (2.52-75.0), p<0.001], having ever lived with HBV infected  
 177 person [cOR 17.31 (5.48-67.79), P<0.001] and use of illicit drugs increased the odds of HBV  
 178 infection (Table 3).

179 **Table 3: Lifestyle characteristics of pregnant women and its association with HBV infection**

|                                        | <b>Hepatitis B Disease</b> |                 | <b>cOR (95% CI)</b>       | <b>P value</b>   |
|----------------------------------------|----------------------------|-----------------|---------------------------|------------------|
|                                        | <b>Cases</b>               | <b>Controls</b> |                           |                  |
| <b>Tattoo &amp; Body piercing</b>      |                            |                 |                           | <b>0.004</b>     |
| Yes                                    | 72 (47.8)                  | 108 (72.9)      | <b>2.46 (1.45-4.19)</b>   |                  |
| No                                     | 66 (52.2)                  | 38 (27.1)       | <b>1.0</b>                |                  |
| <b>Multiple sexual partners</b>        |                            |                 |                           | <b>&lt;0.001</b> |
| Yes                                    | 102(87.2)                  | 116 (99.1)      | <b>17.06 (2.52-75.0)</b>  |                  |
| No                                     | 15 (12.8)                  | 1 (0.9)         | <b>1.0</b>                |                  |
| <b>Peno-anal sex history</b>           |                            |                 |                           | 0.078            |
| Yes                                    | 124(96.1)                  | 140 (99.3)      | 5.65 (0.62-268.8)         |                  |
| No                                     | 5 (3.9)                    | 1 (0.7)         | 1.0                       |                  |
| <b>Living with HBV infected person</b> |                            |                 |                           | <b>0.000</b>     |
| Yes                                    | 93 (66.4)                  | 137 (97.2)      | <b>17.31 (5.98-67.79)</b> |                  |
| No                                     | 47 (33.6)                  | 4 (2.8)         | 1.0                       |                  |
| <b>Illicit drug use</b>                |                            |                 |                           | <b>0.004</b>     |
| Yes                                    | 104 (74.8)                 | 128 (90.8)      | <b>3.31 (1.607.17)</b>    |                  |
| No                                     | 35 (25.2)                  | 13 (9.2)        | <b>1.0</b>                |                  |

180

181  
 182 **Factors associated with HBV among pregnant women, Greater Moronvia, 2017**  
 183 After adjusting for confounders, employment status, income level, history of STI and living with  
 184 an HBV infected person remained significantly associated with HBV infection. Pregnant women  
 185 who earned less than USD 100 showed higher odds [aOR=13.0 (4.48-37.82, p< 0.001) of HBV  
 186 infection than those who earned ≥USD 100. Pregnant women who were employed in the formal  
 187 sector had a lower odd [aOR=0.04 (0.09-0.179), p-value <0.001] of HBV infections than those  
 188 who were employed in the informal sector. Regarding STIs, pregnant women who reported history  
 189 of STI had higher odds [aOR=5.19 (1.68-16.02), p= 0.004] of been diagnosed HBV positive than  
 190 those who had no STI history. Also, having a history of living with an HBV infected person  
 191 rendered pregnant women more prone [aOR=35.11 (4.24-58.9), p=0.001] to HBV infection than  
 192 those with no history (Table 4).

193  
 194 **Table 4: Multivariate analysis of determinants and its association with HBV among pregnant**  
 195 **women**

| Variable                        | HBV diseases |             | Adjusted Odd ratio<br>(95%CI) | P value          |
|---------------------------------|--------------|-------------|-------------------------------|------------------|
|                                 | Cases        | Controls    |                               |                  |
| <b>Income level of PW</b>       |              |             |                               |                  |
| <100USD                         | 76 (55.07)   | 124 (85.71) | <b>13.0 (4.48-37.82)</b>      | <b>&lt;0.001</b> |
| ≥100USD                         | 62(44.93)    | 16 (14.29)  | 1.0                           |                  |
| <b>Employment status of PW</b>  |              |             |                               |                  |
| Unemployed                      | 132 (93.61)  | 104 (73.76) | <b>0.04 (0.09-0.179)</b>      | <b>&lt;0.001</b> |
| Employed                        | 9 (6.39)     | 37 (26.24)  | <b>1.0</b>                    |                  |
| <b>Major surgical procedure</b> |              |             |                               |                  |
| Yes                             | 103 (73.57)  | 131 (92.91) | 4.06 (0.731-22.59)            | 0.109            |
| No                              | 37(26.43)    | 10 (7.09)   | 1.0                           |                  |
| <b>Illicit drug use</b>         |              |             |                               |                  |
| Yes                             | 104 (74.83)  | 128 (90.78) | 4.02 (0.39-40.44)             | 0.237            |

|                                        |            |             |                          |                  |
|----------------------------------------|------------|-------------|--------------------------|------------------|
| No                                     | 35 (25.17) | 13 (9.22)   | 1.0                      |                  |
| <b>Tattoo &amp; Body piercing</b>      |            |             |                          | <b>0.535</b>     |
| Yes                                    | 72 (47.82) | 108 (73.98) | 0.86 (0.24-2.14)         |                  |
| No                                     | 66 (52.18) | 38 (26.02)  | 1.0                      |                  |
| <b>Multiple sexual partners</b>        |            |             |                          | <b>0.425</b>     |
| Yes                                    | 102(87.18) | 116 (99.15) | 2.81 (0.22-35.55)        |                  |
| No                                     | 15 (12.82) | 1 (0.85)    | 1.0                      |                  |
| <b>Living with HBV infected person</b> |            |             |                          | <b>&lt;0.001</b> |
| Yes                                    | 93 (66.42) | 137 (97.17) | <b>35.11 (4.24-58.9)</b> |                  |
| No                                     | 47 (33.58) | 4 (2.83)    | 1.0                      |                  |
| <b>Ever diagnosed an STI</b>           |            |             |                          | <b>0.004</b>     |
| Yes                                    | 75(53.2)   | 52(37.0)    | <b>5.19 (1.68-16.02)</b> |                  |
| No                                     | 66(46.8)   | 87(63.0)    | 1.0                      |                  |

196

197

198

199

200

201

## **Discussion**

Hepatitis B virus infection is one of the world's leading public health challenges, causing significant morbidity and mortality (24). A newborn infant whose mother is positive for both HBsAg and HBeAg has a 90% chance of developing chronic infection by the age of 6 (24). Hepatitis B virus infection among pregnant women pose a serious public threat to both mother and baby and must be given the needed attention. It is on this premise that this study sought to determine factors associated with Hepatitis B Virus infection among pregnant women of Greater Monrovia.

This study found an association between Hepatitis B virus infection and factors including informal sector employment, low-income status, having a history of Sexually Transmitted Infections (STIs), and living with a Hepatitis B Virus infected person.

### **Socio-demographic factors and medical history**

Current study indicates reduced odds of contracting HBV among pregnant women who were in the formal sector employment than those who were in the informal sector employment. This can be attributed to their improved economic and educational status leading to increased knowledge and awareness of HBV as well as having access to good medical care. Present findings agrees to a study conducted in Ethiopia as pregnant women who were unemployed were 8 times at risk of HBV infection than those who were employed (25). A recent study on the knowledge of hepatitis B virus among pregnant women in the Ningo-Prampram District in Ghana found a strong association between educational level and positivity to hepatitis b virus (26). This study also found an association between income status and HBV, as participants who earn <100USD had higher odds of developing HBV infection than those who earn  $\geq$ 100USD. This agrees with a study conducted in Brazil which indicates a higher prevalence of HPV infection among individuals of lower socioeconomic status (27). Another study in Japan also confirms association between socioeconomic status and hepatitis B virus prevalence (28). Additionally, pregnant women who reported ever having sexually transmitted infection were more likely to be HBV infected than those who had never had any STIs.

## **Lifestyle factors associated with HBV infection**

The investigation delved into lifestyle-related factors, elucidating their association with HBV infection. Living with a Hepatitis B infected person was significantly associated with HBV infection among pregnant women in in this study. The virus can spread through contact with infected body fluids such as blood, saliva, vaginal fluids, and semen. Living with an infected person exposes you to these fluids thereby increasing risk of transmission. This concurs with many recent findings (24,26). A study conducted by Freitas et al. (2014) in Central Brazil also observed that pregnant women who resided with or had previous exposure to an individual infected with Hepatitis B had a higher likelihood of acquiring HBV infection compared to those who had no history of living with a Hepatitis B-infected individual. It is evident that pregnant women who had previously resided with an individual infected with Hepatitis B exhibited increased likelihood of being diagnosed as HBV positive, in comparison to those who had never cohabitated with a Hepatitis B infected individual (30,31). Another study conducted in Northwestern Ethiopia Molla et al. (2015) validates the findings of current study as it also observed that pregnant women who had previously resided or were now residing with an individual infected with Hepatitis B exhibited a greater likelihood of experiencing adverse outcomes related to HBV compared to pregnant women who had never cohabited with a Hepatitis B infected individual. Another study in Tanzania also reported similar findings (33).

## **Conclusion**

This study provides valuable insights into the complex interrelationships between socio-demographic, medical, and lifestyle factors influencing HBV infection among pregnant women in Greater Monrovia, Liberia. The study found that several risk factors significantly associated

with Hepatitis B infection among pregnant women who registered for antenatal care in Greater Monrovia. These factors included having formal employment, having a low-income level, having a history of sexually transmitted infections, and living with a person infected with Hepatitis B virus. The multifactorial nature of HBV transmission underscores the importance of tailored interventions focusing on education, healthcare accessibility, behavioural modifications, and targeted screening programs to mitigate the burden of HBV among this vulnerable population. The Ministry of Health of Liberia and developing partners must enhance interventions aimed at preventing and controlling sexually transmitted infections (STIs), including initiatives focused on creating awareness on STI prevention and control as well as promoting HBV vaccination among uninfected individuals.

## Acknowledgment

The authors would like to thank all the health facilities and participants who availed themselves for this study.

## References

1. Matthews PC, Maponga T, Ghosh I, Lemoine M, Ocamá P, Abubakar I, et al. Hepatitis B Virus: Infection, liver disease, carcinogen or syndemic threat? Remodelling the clinical and public health response. *PLOS Glob Public Heal* [Internet]. 2022;2(12):e0001359. Available from: <http://dx.doi.org/10.1371/journal.pgph.0001359>
2. Ajuwon BI, Yujuico I, Roper K, Richardson A, Sheel M, Lidbury BA. Hepatitis B virus infection in Nigeria: a systematic review and meta-analysis of data published between 2010 and 2019. *BMC Infect Dis* [Internet]. 2021;21(1):1–15. Available from: <https://doi.org/10.1186/s12879-021-06800-6>
3. Amin O, Powers J, Bricker KM, Chahroudi A. Understanding Viral and Immune Interplay During Vertical Transmission of HIV: Implications for Cure. *Front Immunol*. 2021;12(October):1–16.
4. Centers for Disease Control and Prevention. Prevention of Hepatitis B Virus Infection in the United States: Recommendations of the Advisory Committee on Immunization Practices. Vol. 67, *Morbidity and Mortality Weekly Report*. 2018.

5. Sanai F, Alkhatry M, Alzanbaji A, Kumar S. Hepatitis B virus infection in Saudi Arabia and the UAE: Public health challenges and their remedial measures. *J Infect Public Health* [Internet]. 2023;16(9):1410–7. Available from: <https://doi.org/10.1016/j.jiph.2023.07.008>
6. Efua SDV, Adwoa WD, Armah D. Seroprevalence of Hepatitis B virus infection and associated factors among health care workers in Southern Ghana. *IJID Reg* [Internet]. 2023;6(November 2022):84–9. Available from: <https://doi.org/10.1016/j.ijregi.2023.01.009>
7. Yendewa GA, Wang G-M, James PB, Massaquoi SPE, Yendewa SA, Ghazawi M, et al. Prevalence of Chronic Hepatitis B Virus Infection in Sierra Leone, 1997–2022: A Systematic Review and Meta-Analysis. *Am J Trop Med Hyg*. 2023;109(1):105–14.
8. Kilonzo SB, Gunda DW, Mpondo BCT, Bakshi FA, Jaka H. Hepatitis B Virus Infection in Tanzania: Current Status and Challenges. *J Trop Med*. 2018;2018.
9. Maamor NH, Muhamad NA, Mohd Dali NS, Abdul Mutalip MH, Leman FN, Aris T, et al. Seroprevalence of Hepatitis B Among Healthcare Workers in Asia and Africa and Its Association With Their Knowledge and Awareness: A Systematic Review and Meta-Analysis. *Front Public Heal*. 2022;10(April):1–12.
10. Abbas Z, Siddiqui AR. Management of hepatitis B in developing countries. *World J Hepatol*. 2011;3(12):292–9.
11. Ofori-Asenso R, Agyeman AA. Hepatitis B in Ghana: A systematic review & meta-analysis of prevalence studies (1995-2015). *BMC Infect Dis* [Internet]. 2016;16(1). Available from: <http://dx.doi.org/10.1186/s12879-016-1467-5>
12. World Health Organization (WHO). Global hepatitis report 2017: web annex A: estimations of worldwide prevalence of chronic hepatitis B virus infection: a systematic review of data published between 1965 and 2017. 2023.
13. Adam A, Fusheini A. Knowledge, risk of infection, and vaccination status of hepatitis B virus among rural high school students in Nanumba North and South Districts of Ghana. *PLoS One* [Internet]. 2020;15(4):1–15. Available from: <http://dx.doi.org/10.1371/journal.pone.0231930>
14. Razavi H. Global Epidemiology of Viral Hepatitis. *Gastroenterol Clin North Am*. 2020;49(2):179–189.
15. Spearman CW, Afihene M, Ally R, Apica B, Awuku Y, Cunha L, et al. Hepatitis B in sub-Saharan Africa: strategies to achieve the 2030 elimination targets. *Lancet Gastroenterol Hepatol* [Internet]. 2017;2(12):900. Available from: [http://dx.doi.org/10.1016/S2468-1253\(17\)30295-9](http://dx.doi.org/10.1016/S2468-1253(17)30295-9)
16. Vueba AN, Almendra R, Santana P, Faria C, do Céu Sousa M. Prevalence of HIV and hepatitis B virus among pregnant women in Luanda (Angola): geospatial distribution and its association with socio-demographic and clinical-obstetric determinants. *Virol J* [Internet]. 2021;18(1):1–11. Available from: <https://doi.org/10.1186/s12985-021-01698-7>
17. Te HS, Jensen DM. Epidemiology of Hepatitis B and C Viruses: A Global Overview. *Clin Liver Dis* [Internet]. 2010;14(1):1–21. Available from: <http://dx.doi.org/10.1016/j.cld.2009.11.009>



18. Veronese P, Dodi I, Esposito S, Indolfi G. Prevention of vertical transmission of hepatitis B virus infection. *World J Gastroenterol.* 2021;27(26):4182–93.
19. Kirbak ALS, Ng'ang'a Z, Omolo J, Idris H, Usman A, Mbabazi WB. Sero-prevalence for hepatitis b virus among pregnant women attending antenatal clinic in Juba teaching hospital, republic of south Sudan. *Pan Afr Med J.* 2017;26:1–7.
20. Fergusson DM, Boden JM, Horwood LJ. Exposure to childhood sexual and physical abuse and adjustment in early adulthood. *Child Abus Negl.* 2008;32(6):607–19.
21. Harvala H, Reynolds C, Gibney Z, Derrick J, Ijaz S, Davison KL, et al. Hepatitis B infections among blood donors in England between 2009 and 2018: Is an occult hepatitis B infection a risk for blood safety? *Transfusion.* 2021;61(8):2402–13.
22. El-Serag HB. Epidemiology of Viral Hepatitis B-related Hepatocellular Carcinoma. *Gastroenterology.* 2012;142(6):1264–73.
23. Scorgie F, Chersich MF, Ntaganira I, Gerbase A, Lule F, Lo YR. Socio-demographic characteristics and behavioral risk factors of female sex workers in sub-Saharan Africa: A systematic review. *AIDS Behav.* 2012;16(4):920–33.
24. Umer A, Teklemariam Z, Ayele F, Mengesha MM. Prevalence of hepatitis B infection and its associated factors among pregnant mothers attending antenatal care at public hospitals at Hararghe, Eastern Ethiopia. *Front Glob Women's Heal.* 2023;4(April):1–11.
25. Tanga AT, Teshome MA, Hiko D, Fikru C, Jilo GK. Sero-prevalence of hepatitis B virus and associated factors among pregnant women in Gambella hospital, South Western Ethiopia: Facility based cross-sectional study. *BMC Infect Dis.* 2019;19(1):1–7.
26. Kwadzokpui PK, Akorsu EE, Abaka-Yawson A, Quarshie SS, Amankwah SA, Tawiah PA. Prevalence and Knowledge of Hepatitis B Virus Infection among Pregnant Women in the Ningo-Prampram District, Ghana. *Int J Hepatol.* 2020;2020.
27. Kops NL, Horvath JDC, Bessel M, Souza FMA, Benzaken AS, Pereira GFM, et al. The impact of socioeconomic status on HPV infection among young Brazilians in a nationwide multicenter study. *Prev Med Reports.* 2021;21.
28. Okui T, Nakashima N. Analysis of the association between areal socioeconomic deprivation levels and viral hepatitis B and C infections in Japanese municipalities. *BMC Public Health [Internet].* 2022;22(1):1–9. Available from: <https://doi.org/10.1186/s12889-022-13089-w>
29. Freitas SZ, Soares CC, Tanaka TSO, Lindenberg ASC, Teles SA, Torres MS, et al. Prevalence, risk factors and genotypes of hepatitis B infection among HIV-infected patients in the State of MS, Central Brazil. *Brazilian J Infect Dis [Internet].* 2014;18(5):473–80. Available from: <http://dx.doi.org/10.1016/j.bjid.2014.01.005>
30. Ezechi OC hukwujekw., Kalejaiye OO lufel., Gab-Okafor CV ivia., Oladele DA yol., Oke BO ludar., Musa ZA desol., et al. Sero-prevalence and factors associated with Hepatitis B and C co-infection in pregnant Nigerian women living with HIV infection. *Pan Afr Med J.* 2014;17:197.
31. Sirilert S, Tongsong T. Hepatitis b virus infection in pregnancy: Immunological response, natural course and pregnancy outcomes. *J Clin Med.* 2021;10(13).

32. Molla S, Munshea A, Nibret E. Seroprevalence of hepatitis B surface antigen and anti HCV antibody and its associated risk factors among pregnant women attending maternity ward of Felege Hiwot Referral Hospital, northwest Ethiopia: A cross-sectional study Hepatitis viruses. *Virology* [Internet]. 2015;12(1):1–9. Available from: <http://dx.doi.org/10.1186/s12985-015-0437-7>
33. Geffert K, Maponga TG, Henerico S, Henerico S, Preiser W, Mongella S, et al. Prevalence of chronic HBV infection in pregnant woman attending antenatal care in a tertiary hospital in Mwanza, Tanzania: A cross-sectional study. *BMC Infect Dis*. 2020;20(1):1–10.

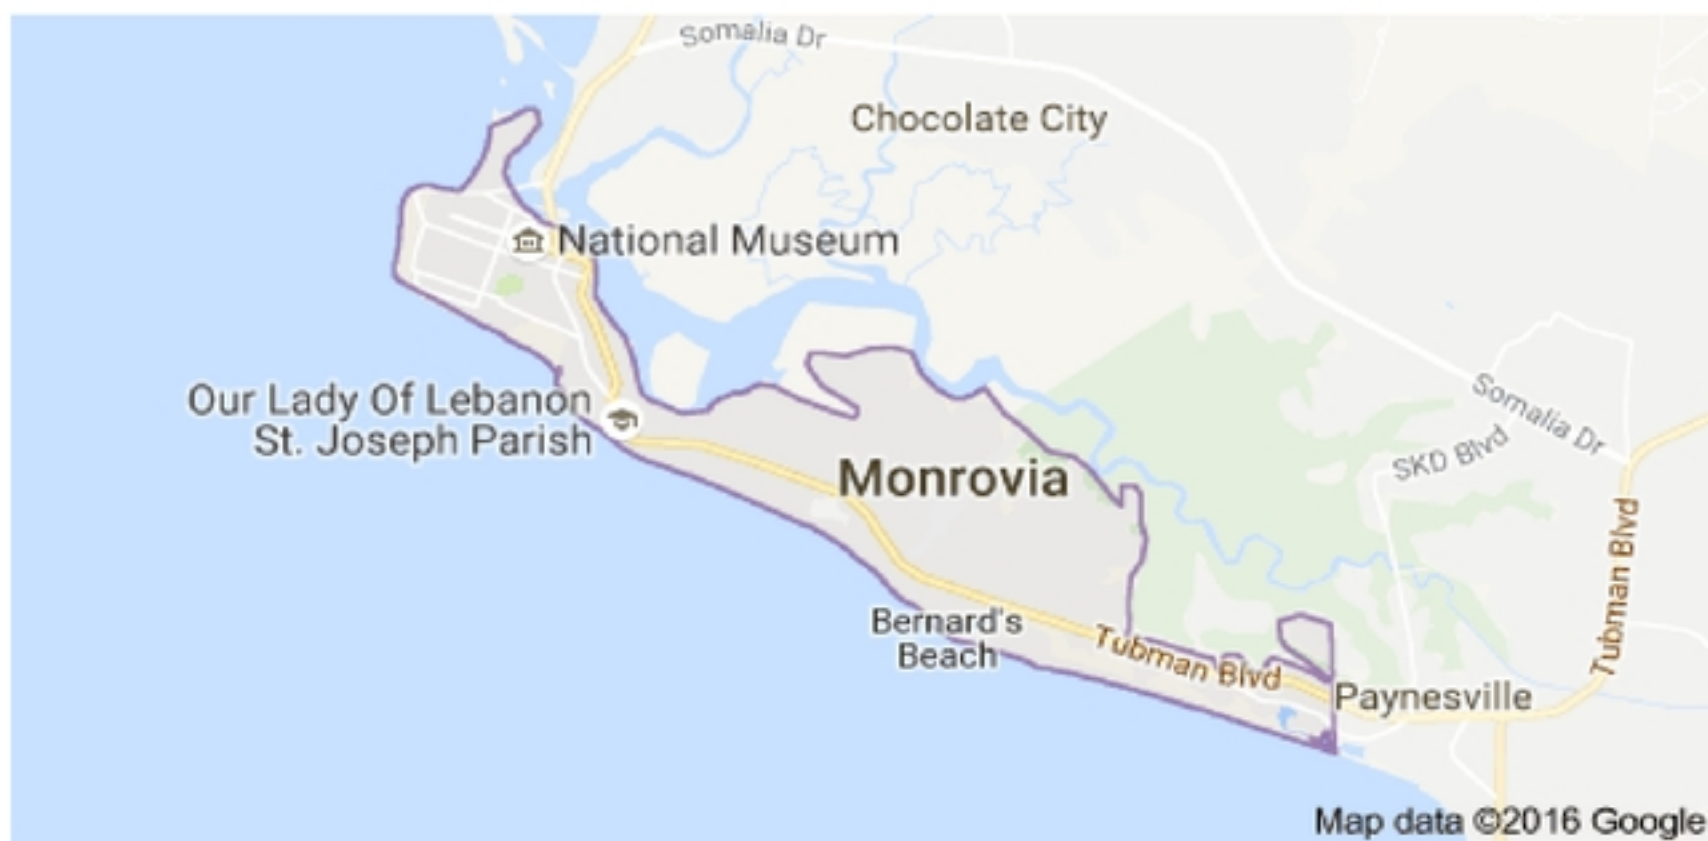

**Figure 1: Map of study area**

medRxiv preprint doi: <https://doi.org/10.1101/2024.01.26.24301847>; this version posted January 29, 2024. The copyright holder for this preprint (which was not certified by peer review) is the author/funder, who has granted medRxiv a license to display the preprint in perpetuity. It is made available under a [CC-BY 4.0 International license](https://creativecommons.org/licenses/by/4.0/).
